# Supplementary material
Source: PubMed Central journal article supplement (PMC7392386)
Supplement: ao9b04483_si_001.pdf [file ao9b04483_si_001.pdf]

## Supporting Information

### Role for Metallothionein-3 in the Resistance of Human U87 Glioblastoma Cells to Temozolomide

Rosa Santangelo<sup>#</sup>, Enrico Rizzarelli<sup>§,†</sup>, Agata Copani<sup>#,†,\*</sup>

<sup>#</sup>Department of Drug Sciences, University of Catania, 95125 Catania, Italy.

<sup>§</sup>Department of Chemical Sciences, University of Catania, 95125 Catania, Italy.

<sup>†</sup>Institute of Crystallography, National Council of Research, 95125 Catania, Italy.

Corresponding author:

Agata Copani\*

[\\*acopani@katamail.com](mailto:acopani@katamail.com)

**Table S1.** Primer sequences for Real-Time PCR analysis

| <b>Primer pairs</b> | <b>Sequence</b>                                                 |
|---------------------|-----------------------------------------------------------------|
| MT <sub>1</sub> A   | F, 5'-GTGCGCCTTATAGCCTCTCA-3'<br>R, 5'-TCTCTGATGCCCTTTGCAG-3'   |
| MT <sub>1</sub> B   | F, 5'-CTCCAGGCTTGTCTTGGCTC-3'<br>R, 5'-CAGCGGCACTTCTCTGATGA-3'  |
| MT <sub>1</sub> E   | F, 5'-AGCATCCCCTTTGCTCGAAA-3'<br>R, 5'-CACTTCTCCGATGCCCTTT-3'   |
| MT <sub>1</sub> F   | F, 5'-CCTCCCCTGACTATCAAAGCA-3'<br>R, 5'-TCTTCTTGCAGGAGGTGCAT-3' |
| MT <sub>1</sub> G   | F, 5'-AACTCTAGTCTCGCCTCGGG-3'<br>R, 5'-CAGGGCTGTCCCACATCAG-3'   |
| MT <sub>1</sub> X   | F, 5'-TCTTGATCGGGAACCTCCTGC-3'<br>R, 5'-CTGCACTTGTCTGACGTCCC-3' |
| MT <sub>2</sub> A   | F, 5'-AACCTGTCCCGACTCTAGCC-3'<br>R, 5'-AGGAGCAGCAGCTTTTCTTGC-3' |
| MT <sub>3</sub>     | F, 5'-CCAAGCGCACAAACGGAA-3'<br>R, 5'-CAGGTCTCAGGGTCCATGTC-3'    |
| ZIP <sub>4</sub>    | F, 5'-CCTTCGCTGGTCTCTACGTG-3'<br>R, 5'-CGGGTCCCGTACTTTCAACA-3'  |
| ZnT <sub>1</sub>    | F, 5'-CCTCGCGTTAAGAGCACCC-3'<br>R, 5'-CAATTCAGCCCGTTGGAGTT-3'   |
| GAPDH               | F, 5'-TGCACCACCAACTGCTTAGC-3'<br>R, 5'-GGCATGGACTGTGGTCATGAG-3' |

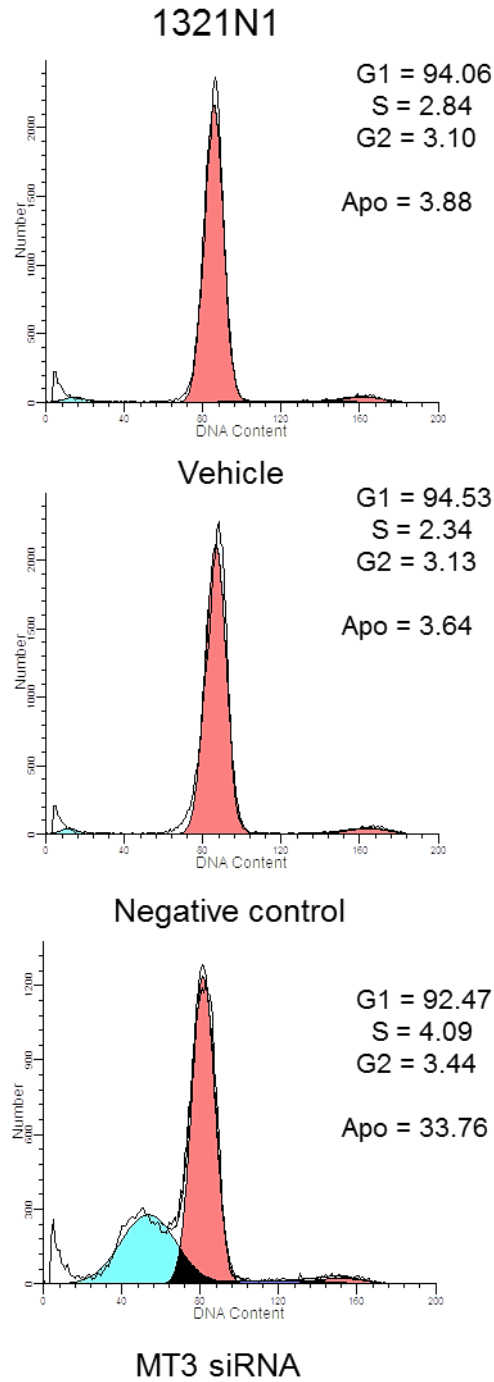

**Figure S1.** Representative histograms for apoptosis and cell cycle distribution profiles of 1321N1 cells treated with vehicle, negative control or MT3 siRNA as indicated. Percentage of G1, S and G2 cells are indicated in the legend. Apoptotic cells (% in the legend) are those distributed in the light blue area preceding the G1 peak. Note MT3 silencing-induced apoptosis of 1321N1 and the lack of effects of both vehicle and negative control.

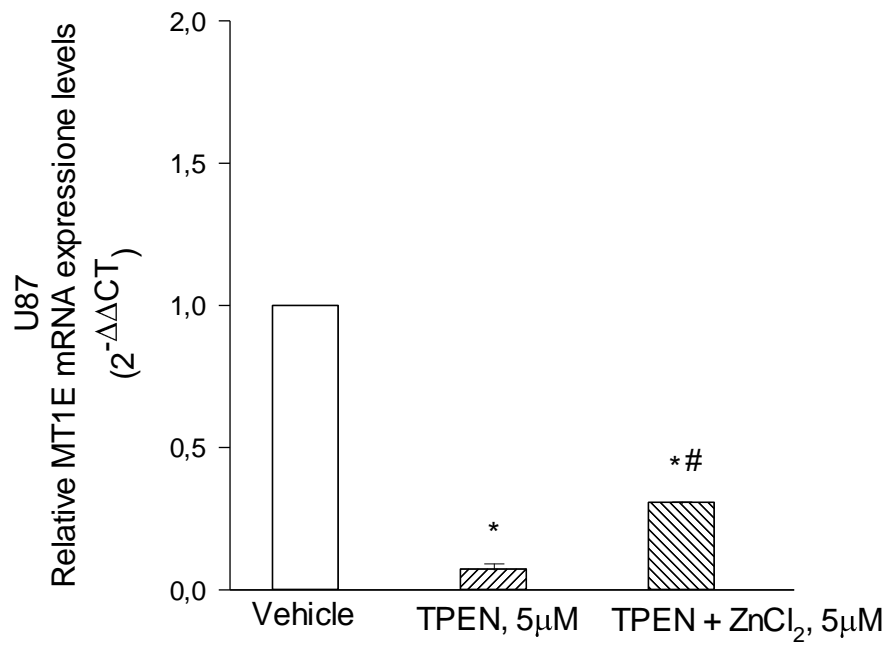

**Figure S2.** TPEN reduced MT1E mRNA expression in U87 cells, and the reduction was prevented in part by the addition of ZnCl<sub>2</sub>. Bars represent the means  $\pm$  SD from two distinct determinations, each performed in duplicate. \*P < 0.05 vs. Vehicle and #p < 0.05 vs. TPEN alone.

# 1321N1

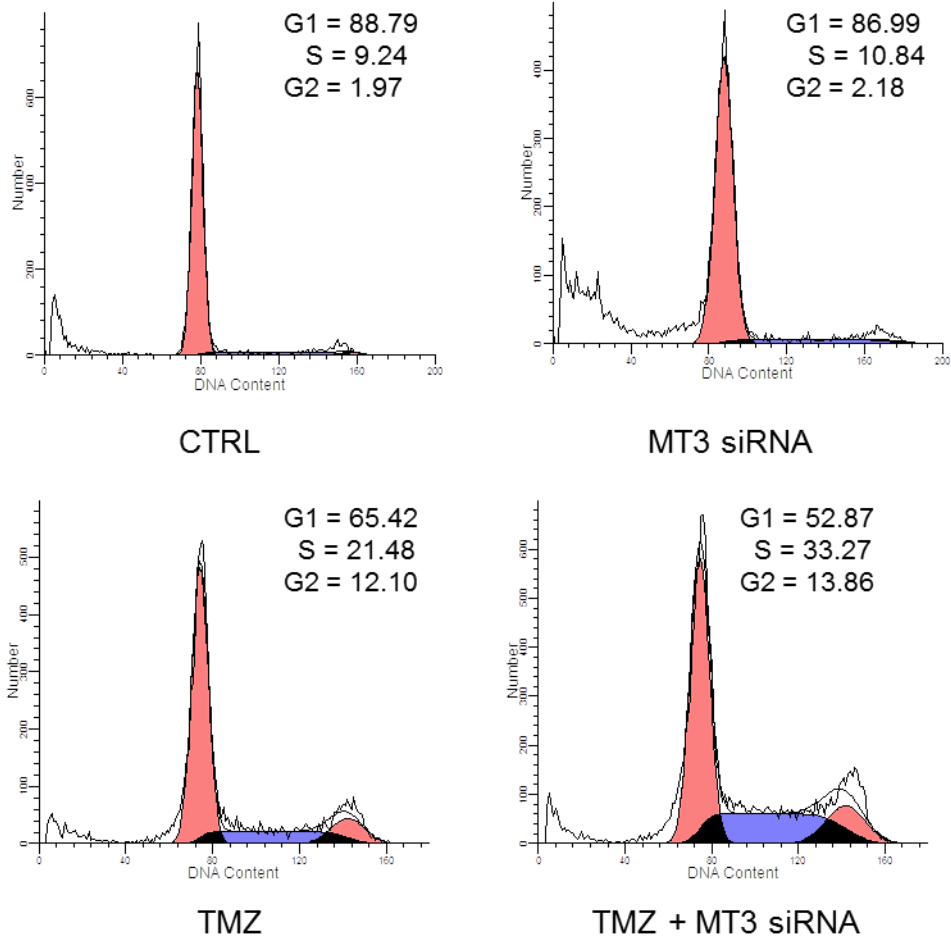

**Figure S3A.** Representative cell cycle distribution profiles of 1321N1 cells treated as indicated below the graphs. Percentages of G1, S and G2 cells are indicated in the legend. Note that TMZ produces a significant accumulation of S and G2 cells, and that MT3 silencing potentiates TMZ effects.

## U 87

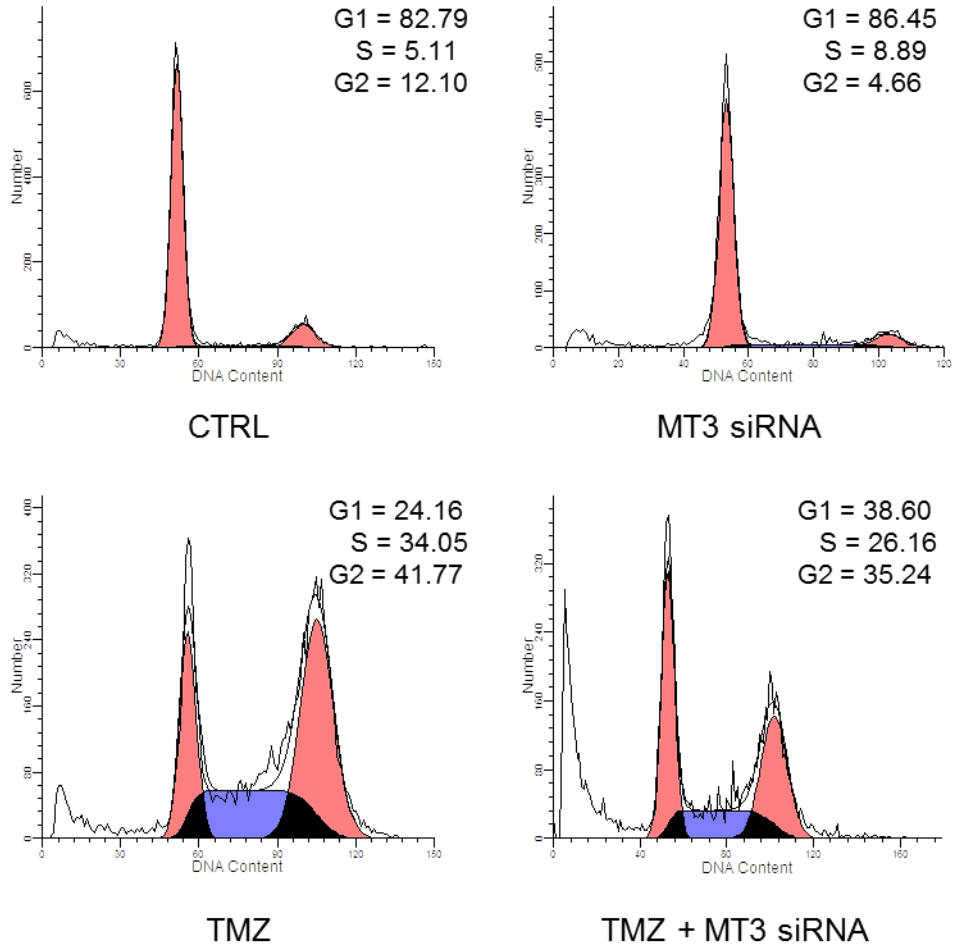

**Figure S3B.** Representative cell cycle distribution profiles of U87 cells treated as indicated below the graphs. Percentages of G<sub>1</sub>, S and G<sub>2</sub> cells are indicated in the legend. Note the significant accumulation of S and G<sub>2</sub> cells with TMZ alone, and the increased G<sub>1</sub> population with TMZ+MT<sub>3</sub> siRNA versus TMZ alone.

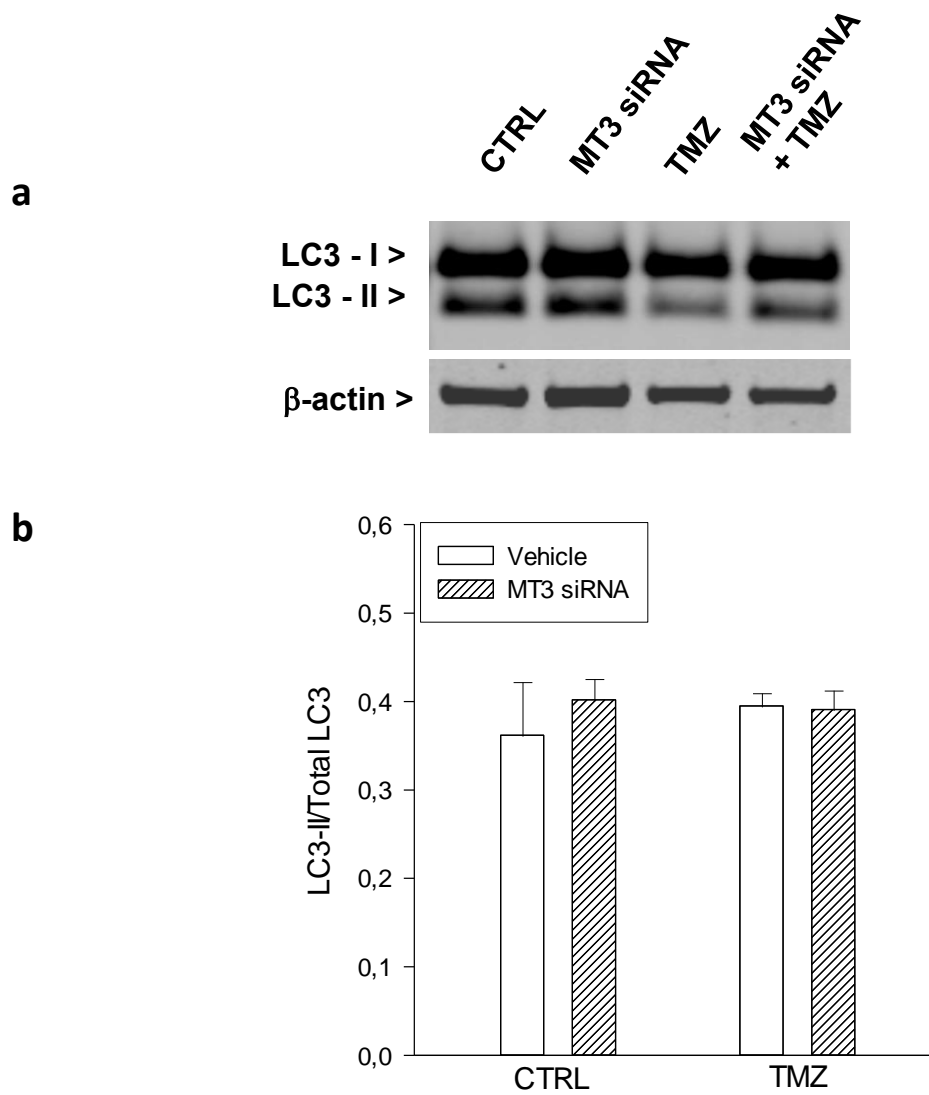

**Figure S4.** Western blot analysis of LC<sub>3</sub> in U87 cells. The two bands, corresponding to the cytosolic LC-I and to the autophagosome-associated LC-II, are shown in (a). None of the treatments affected the band signals. The densitometric analysis of bands from two separate western blots is presented in (b). Both LC<sub>3</sub>-I and LC<sub>3</sub>-II signals were normalized against β-actin before the calculation of the LC<sub>3</sub>-II/Total LC<sub>3</sub> ratio. Bars represent the means ± SD of 2 determinations.

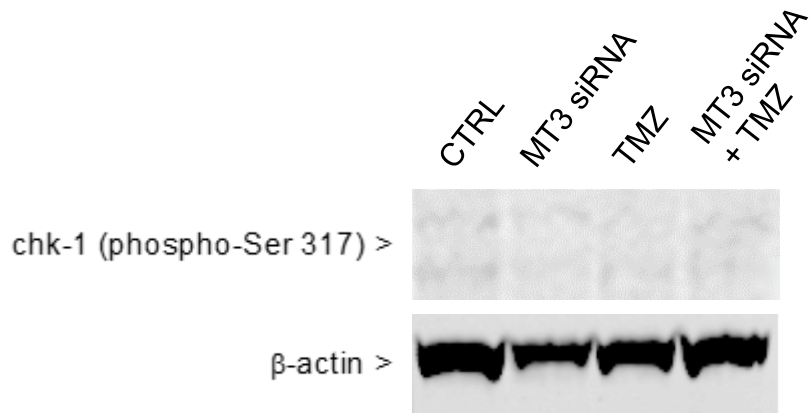

**Figure S5.** Western blot image of phosphorylated chk-1 at serine 317 and corresponding  $\beta$ -actin bands as a control for loading. Note that the chk-1(phospho-Ser 317) signal was barely visible under all conditions.



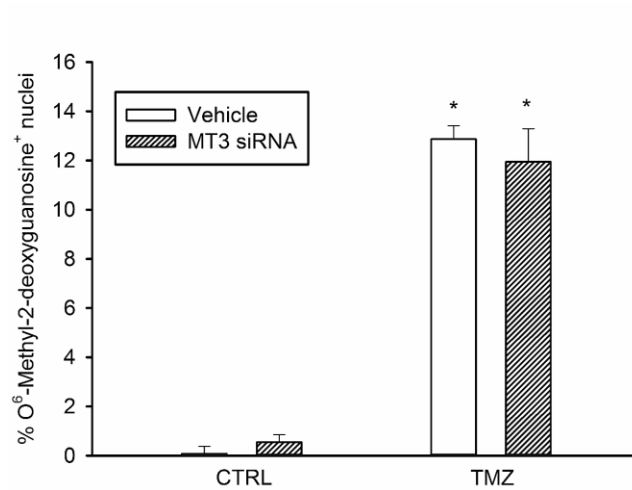

**Figure S6.** Flow cytometric analysis of isolated nuclei from U87 GBM cells following immunostaining for O6-methyl-2-deoxyguanosine. Bars represent the means  $\pm$  SEM of four determinations. An average of 5000 nuclei/determination was counted. Note the significant percentage of immunopositive nuclei with TMZ (100  $\mu$ M for 96 hours), which did not change with the addition of MT3 siRNA (5 nM for 96 hours). \*P < 0.05 vs. the corresponding control (CTRL).
